# Supplementary material for: Bioactive Hydrolysates from Chlorella vulgaris: Optimal Process and Bioactive Properties
Source: MDPI journal article supplement (doi:10.3390/molecules27082505), 2022-04-13
Supplement: s1 [file s1]

## Supplementary Materials

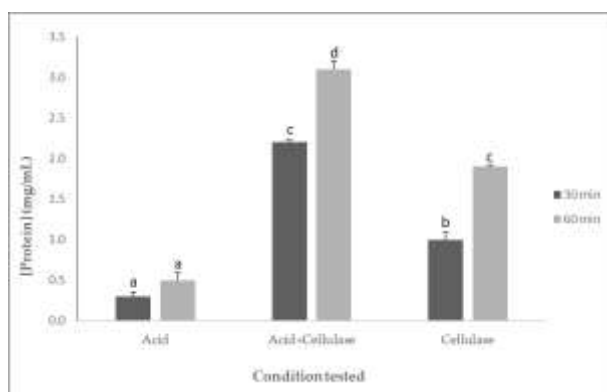

**Figure S1.** Protein concentration of the extract after treatment with an acid solution, or after hydrolysis with cellulase, or after being submitted to a combination of both conditions, after 30 and 60 min. Different letters refer to significant differences at  $p < 0.05$  (ANOVA One-Way followed by Tukey's post hoc test).

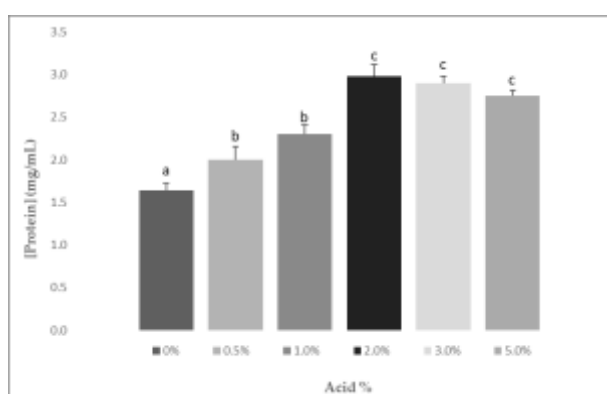

**Figure S2.** Protein concentration of the extract after being treated with different % of an acid solution for 1 h, followed by a cellulase hydrolysis. Different letters refer to significant differences at  $p < 0.05$  (ANOVA One-Way followed by Tukey's post hoc test).

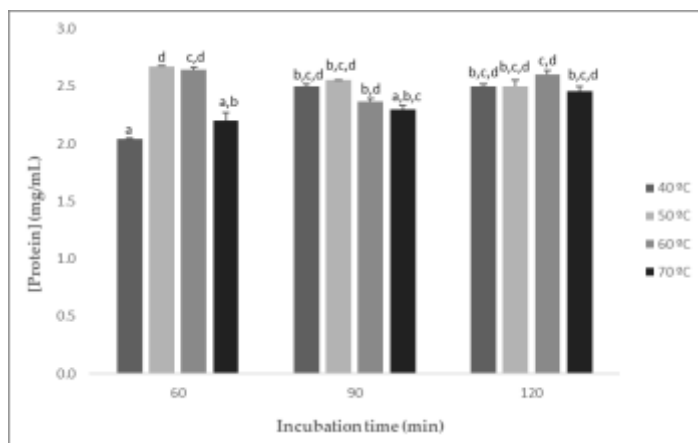

**Figure S3.** Protein concentration of the extract after being incubated with a 2% acid solution, followed by a cellulase hydrolysis at different temperatures. Different letters refer to significant differences at  $p < 0.05$  (ANOVA One-Way followed by Tukey's post hoc test).

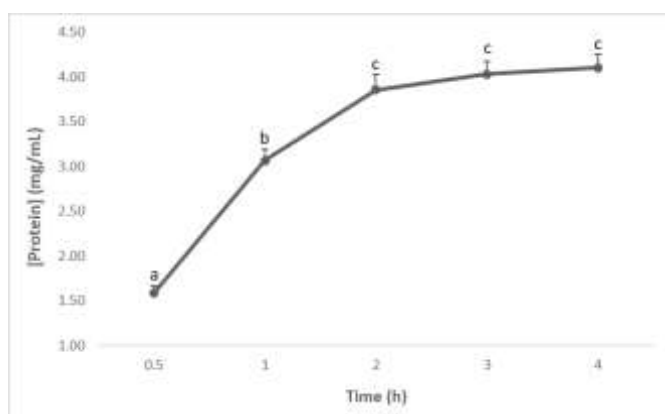

**Figure S4.** Protein concentration of the extract produced by treatment with a 2% acid solution, followed by a hydrolysis with 2% cellulase. Different letters refer to significant differences at  $p < 0.05$  (ANOVA One-Way followed by Tukey's post hoc test).

**Table S1.** Box-Behnken factorial design matrix for four factors and hydrolysate yield and protein release for each run.

| Run | Factors                                       |                               |                              | Evaluated characteristics             |                       |                     |
|-----|-----------------------------------------------|-------------------------------|------------------------------|---------------------------------------|-----------------------|---------------------|
|     | Hydrolysis temperature (°C) (X <sub>A</sub> ) | % Cellulase (X <sub>B</sub> ) | % Protease (X <sub>C</sub> ) | Hydrolysis time (h) (X <sub>D</sub> ) | Hydrolysate yield (%) | Protein release (%) |
| 1   | 50                                            | 1.67                          | 3.33                         | 2                                     | 69.21 ± 0.01          | 74.08 ± 0.01        |
| 2   | 40                                            | 3.33                          | 1.67                         | 4                                     | 60.98 ± 0.02          | 55.65 ± 0.32        |
| 3   | 50                                            | 3.33                          | 3.33                         | 4                                     | 72.04 ± 0.24          | 71.39 ± 0.54        |
| 4   | 50                                            | 5.00                          | 3.33                         | 2                                     | 68.12 ± 0.12          | 77.91 ± 0.20        |
| 5   | 40                                            | 5.00                          | 3.33                         | 4                                     | 66.63 ± 0.23          | 69.56 ± 0.17        |
| 6   | 50                                            | 3.33                          | 1.67                         | 6                                     | 47.52 ± 0.12          | 76.07 ± 0.03        |
| 7   | 50                                            | 5.00                          | 3.33                         | 6                                     | 76.02 ± 0.02          | 77.60 ± 0.18        |
| 8   | 60                                            | 3.33                          | 1.67                         | 4                                     | 60.04 ± 0.24          | 79.42 ± 0.45        |
| 9   | 40                                            | 3.33                          | 5.00                         | 4                                     | 58.95 ± 0.05          | 60.65 ± 0.63        |
| 10  | 60                                            | 1.67                          | 3.33                         | 4                                     | 60.74 ± 0.14          | 70.47 ± 0.27        |
| 11  | 50                                            | 3.33                          | 3.33                         | 4                                     | 72.30 ± 0.10          | 75.70 ± 0.41        |
| 12  | 60                                            | 5.00                          | 3.33                         | 4                                     | 52.20 ± 0.00          | 57.38 ± 0.12        |
| 13  | 50                                            | 3.33                          | 1.67                         | 2                                     | 47.31 ± 0.09          | 50.63 ± 0.10        |
| 14  | 50                                            | 5.00                          | 1.67                         | 4                                     | 47.00 ± 0.13          | 45.89 ± 0.25        |
| 15  | 40                                            | 3.33                          | 3.33                         | 6                                     | 50.35 ± 0.01          | 64.01 ± 0.35        |
| 16  | 50                                            | 3.33                          | 3.33                         | 4                                     | 72.39 ± 0.05          | 68.70 ± 0.14        |
| 17  | 40                                            | 3.33                          | 3.33                         | 2                                     | 49.25 ± 0.20          | 58.95 ± 1.21        |
| 18  | 50                                            | 3.33                          | 5.00                         | 6                                     | 58.40 ± 3.18          | 61.66 ± 2.52        |
| 19  | 40                                            | 1.67                          | 3.33                         | 4                                     | 49.18 ± 0.00          | 58.99 ± 0.85        |
| 20  | 50                                            | 3.33                          | 5.00                         | 2                                     | 68.80 ± 0.07          | 71.04 ± 1.32        |
| 21  | 60                                            | 3.33                          | 5.00                         | 4                                     | 67.76 ± 0.42          | 82.13 ± 0.12        |
| 22  | 50                                            | 1.67                          | 3.33                         | 6                                     | 61.67 ± 0.25          | 71.19 ± 0.84        |
| 23  | 60                                            | 3.33                          | 3.33                         | 2                                     | 55.38 ± 2.90          | 69.37 ± 1.21        |
| 24  | 50                                            | 1.67                          | 5.00                         | 4                                     | 73.35 ± 0.06          | 71.05 ± 1.48        |
| 25  | 60                                            | 3.33                          | 3.33                         | 6                                     | 67.10 ± 0.03          | 76.08 ± 1.45        |
| 26  | 50                                            | 5.00                          | 5.00                         | 4                                     | 74.54 ± 1.20          | 66.54 ± 0.83        |
| 27  | 50                                            | 1.67                          | 1.67                         | 4                                     | 55.57 ± 0.42          | 56.22 ± 0.15        |

**Table S2.** Hidden peaks retention volume, resulting from the model Local Maximum.

| Peak number | Retention volume (ml) |
|-------------|-----------------------|
| 1           | 25.70                 |
| 2           | 25.80                 |
| 3           | 25.83                 |
| 4           | 25.86                 |
| 5           | 25.89                 |
| 6           | 25.92                 |
| 7           | 25.95                 |
| 8           | 25.97                 |
| 9           | 26.02                 |
| 10          | 26.24                 |
| 11          | 26.33                 |
| 12          | 26.45                 |
| 13          | 26.48                 |
| 14          | 26.58                 |
| 15          | 26.64                 |
| 16          | 26.66                 |
| 17          | 26.70                 |
| 18          | 26.75                 |
| 19          | 26.78                 |
| 20          | 26.80                 |
| 21          | 26.81                 |
| 22          | 26.83                 |
| 23          | 26.86                 |
| 24          | 26.99                 |
| 25          | 27.05                 |
| 26          | 27.26                 |
| 27          | 27.37                 |
| 28          | 27.41                 |
| 29          | 27.58                 |
| 30          | 27.87                 |
| 31          | 27.89                 |
| 32          | 28.01                 |
| 33          | 28.19                 |
| 34          | 28.49                 |
| 35          | 36.39                 |
| 36          | 36.41                 |
| 37          | 38.16                 |
| 38          | 41.32                 |
| 39          | 43.22                 |
| 40          | 49.43                 |
| 41          | 49.44                 |
| 42          | 53.19                 |
